# Supplementary material for: Antibacterial Films Based on PVA and PVA–Chitosan Modified with Poly(Hexamethylene Guanidine)
Source: PubMed Central journal article supplement (PMC6960635; doi:10.3390/polym11122093), 2019-12-13
Supplement: polymers-11-02093-s001.pdf [file polymers-11-02093-s001.pdf]

Supplementary Materials

## Antibacterial Films Based on PVA and PVA–Chitosan Modified with Poly(Hexamethylene Guanidine)

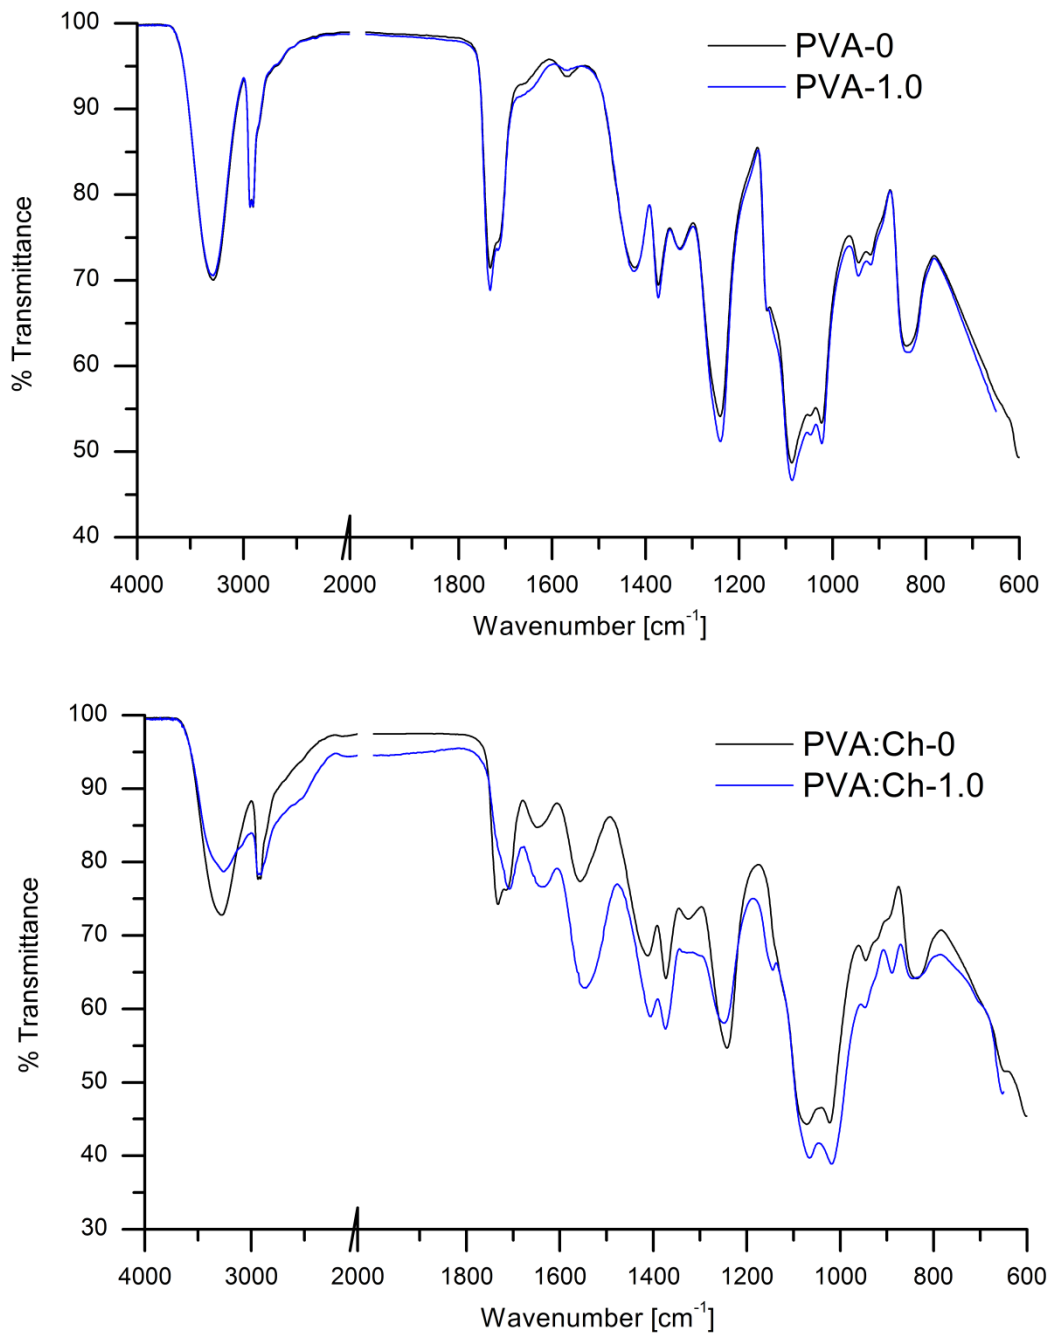

**Figure S1.** FTIR-ATR (Fourier transform infrared–attenuated total reflectance) spectra of PVA-0 and PVA-1.0, PVA:Ch-0 and PVA:Ch-1.0.
